# Supplementary material for: Dust sputtering within the inner heliosphere: a modelling study
Source: Copernicus journal article supplement (doi:10.5194/angeo-38-919-2020), 2020-08-03
Supplement: Supplementary file 1 [file angeo-38-919-2020-supplement.zip]

Archive with 5 entries (5 files):
- AstronomicalSilicate.txt
- angeo-38-919-2020-supplement-title-page.pdf
- carbon.txt
- FeOMgO.txt
- supplement_material.pdf
