# Supplementary material for: Dust sputtering within the inner heliosphere: a modelling study
Source: Copernicus journal article supplement (doi:10.5194/angeo-38-919-2020), 2020-08-03
Supplement: Supplementary file 1 [file angeo-38-919-2020-supplement.zip › angeo-38-919-2020-supplement-title-page.pdf]

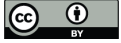

## *Supplement of*

# **Dust sputtering within the inner heliosphere: a modelling study**

**Carsten Baumann et al.**

*Correspondence to:* Carsten Baumann ([carsten.baumann@dlr.de](mailto:carsten.baumann@dlr.de))

- [angeo-38-919-2020-supplement-title-page.pdf](#)
- [AstronomicalSilicate.txt](#)
- [FeOMgO.txt](#)
- [carbon.txt](#)
- [supplement\\_material.pdf](#)

The copyright of individual parts of the supplement might differ from the CC BY 4.0 License.
