# Supplementary material for: Dust sputtering within the inner heliosphere: a modelling study
Source: Copernicus journal article supplement (doi:10.5194/angeo-38-919-2020), 2020-08-03
Supplement: Supplementary file 1 [file angeo-38-919-2020-supplement.zip › AstronomicalSilicate.txt]

Silicate
H,0.0059,0.0034,0.0030,0.0209,0.0109,0.0047,0.0040,0.0346,0.0103,0.0049,0.0039,0.0305 
He,0.0316,0.0179,0.0158,0.0997,0.0643,0.0354,0.0334,0.2199,0.0540,0.0281,0.0254,0.1696 
C,0.1809,0.0999,0.0875,0.5699,0.3014,0.1603,0.1469,0.9641,0.2663,0.1440,0.1341,0.8738 
O,0.2526,0.1401,0.1245,0.8138,0.4103,0.2171,0.1974,1.3400,0.3605,0.2008,0.1814,1.1800 
N,0.2159,0.1183,0.1096,0.7044,0.3614,0.1924,0.1759,1.1600,0.3209,0.1748,0.1613,1.0400 
Fe,0.8735,0.4798,0.4412,2.8600,0.9772,0.5234,0.4762,3.1800,0.9751,0.5217,0.4816,3.1700 
Ne,0.3213,0.1784,0.1634,1.0600,0.4925,0.2704,0.2458,1.6000,0.4367,0.2343,0.2133,1.4100 
Mg,0.3964,0.2142,0.1924,1.2800,0.5636,0.3010,0.2769,1.8200,0.5222,0.2875,0.2575,1.7100 
Si,0.4783,0.2589,0.2393,1.5700,0.6416,0.3502,0.3141,2.0900,0.5772,0.3054,0.2834,1.8700 
S,0.5407,0.2945,0.2688,1.7500,0.7136,0.3899,0.3431,2.3100,0.6676,0.3534,0.3217,2.1300 
Temperature/partial pressure
1.496e+09,3.185e+03,3.187e+03,3.215e+03,4.284e+04,4.324e+04,4.926e+04 
1.567e+09,3.124e+03,3.126e+03,3.154e+03,3.215e+04,3.246e+04,3.704e+04 
1.642e+09,3.064e+03,3.066e+03,3.094e+03,2.415e+04,2.438e+04,2.788e+04 
1.720e+09,3.005e+03,3.007e+03,3.035e+03,1.815e+04,1.833e+04,2.100e+04 
1.802e+09,2.947e+03,2.949e+03,2.977e+03,1.364e+04,1.378e+04,1.582e+04 
1.888e+09,2.891e+03,2.892e+03,2.920e+03,1.031e+04,1.036e+04,1.193e+04 
1.978e+09,2.835e+03,2.837e+03,2.864e+03,7.744e+03,7.824e+03,8.986e+03 
2.072e+09,2.780e+03,2.782e+03,2.809e+03,5.812e+03,5.874e+03,6.767e+03 
2.170e+09,2.726e+03,2.728e+03,2.755e+03,4.357e+03,4.404e+03,5.091e+03 
2.274e+09,2.673e+03,2.675e+03,2.702e+03,3.259e+03,3.296e+03,3.824e+03 
2.382e+09,2.621e+03,2.623e+03,2.650e+03,2.433e+03,2.460e+03,2.867e+03 
2.495e+09,2.570e+03,2.572e+03,2.598e+03,1.811e+03,1.832e+03,2.132e+03 
2.614e+09,2.519e+03,2.521e+03,2.548e+03,1.336e+03,1.352e+03,1.590e+03 
2.739e+09,2.470e+03,2.472e+03,2.498e+03,9.875e+02,9.999e+02,1.175e+03 
2.869e+09,2.421e+03,2.423e+03,2.449e+03,7.228e+02,7.322e+02,8.650e+02 
3.006e+09,2.374e+03,2.375e+03,2.401e+03,5.304e+02,5.339e+02,6.344e+02 
3.149e+09,2.326e+03,2.328e+03,2.354e+03,3.823e+02,3.876e+02,4.634e+02 
3.299e+09,2.280e+03,2.282e+03,2.307e+03,2.761e+02,2.801e+02,3.346e+02 
3.456e+09,2.235e+03,2.236e+03,2.261e+03,1.984e+02,1.999e+02,2.405e+02 
3.620e+09,2.190e+03,2.192e+03,2.216e+03,1.409e+02,1.431e+02,1.720e+02 
3.793e+09,2.146e+03,2.147e+03,2.172e+03,9.945e+01,1.003e+02,1.224e+02 
3.973e+09,2.103e+03,2.104e+03,2.128e+03,6.983e+01,7.042e+01,8.591e+01 
4.163e+09,2.060e+03,2.061e+03,2.085e+03,4.835e+01,4.877e+01,5.998e+01 
4.361e+09,2.018e+03,2.019e+03,2.043e+03,3.327e+01,3.357e+01,4.163e+01 
4.569e+09,1.976e+03,1.978e+03,2.001e+03,2.254e+01,2.297e+01,2.848e+01 
4.786e+09,1.936e+03,1.937e+03,1.960e+03,1.532e+01,1.548e+01,1.935e+01 
5.014e+09,1.896e+03,1.897e+03,1.920e+03,1.025e+01,1.036e+01,1.307e+01 
5.253e+09,1.856e+03,1.858e+03,1.880e+03,6.741e+00,6.887e+00,8.687e+00 
5.503e+09,1.817e+03,1.819e+03,1.841e+03,4.402e+00,4.501e+00,5.734e+00 
5.765e+09,1.779e+03,1.780e+03,1.803e+03,2.854e+00,2.888e+00,3.760e+00 
6.039e+09,1.741e+03,1.743e+03,1.765e+03,1.816e+00,1.861e+00,2.422e+00 
6.327e+09,1.704e+03,1.705e+03,1.727e+03,1.147e+00,1.162e+00,1.530e+00 
6.628e+09,1.667e+03,1.669e+03,1.690e+03,7.102e-01,7.293e-01,9.593e-01 
6.944e+09,1.631e+03,1.633e+03,1.654e+03,4.362e-01,4.484e-01,5.970e-01 
7.274e+09,1.595e+03,1.597e+03,1.618e+03,2.621e-01,2.697e-01,3.638e-01 
7.621e+09,1.560e+03,1.562e+03,1.582e+03,1.561e-01,1.609e-01,2.168e-01 
7.984e+09,1.526e+03,1.527e+03,1.548e+03,9.231e-02,9.378e-02,1.300e-01 
8.364e+09,1.491e+03,1.493e+03,1.513e+03,5.242e-02,5.418e-02,7.504e-02 
8.762e+09,1.458e+03,1.459e+03,1.479e+03,2.999e-02,3.052e-02,4.291e-02 
9.179e+09,1.424e+03,1.426e+03,1.445e+03,1.643e-02,1.703e-02,2.390e-02 
9.616e+09,1.391e+03,1.393e+03,1.412e+03,8.908e-03,9.252e-03,1.319e-02 
1.007e+10,1.359e+03,1.360e+03,1.380e+03,4.785e-03,4.881e-03,7.218e-03 
1.055e+10,1.327e+03,1.328e+03,1.347e+03,2.496e-03,2.549e-03,3.762e-03 
1.106e+10,1.295e+03,1.297e+03,1.316e+03,1.262e-03,1.318e-03,1.982e-03 
1.158e+10,1.264e+03,1.265e+03,1.284e+03,6.309e-04,6.455e-04,9.903e-04 
1.213e+10,1.233e+03,1.234e+03,1.253e+03,3.050e-04,3.124e-04,4.894e-04 
1.271e+10,1.203e+03,1.204e+03,1.222e+03,1.458e-04,1.495e-04,2.336e-04 
1.332e+10,1.173e+03,1.174e+03,1.192e+03,6.719e-05,6.899e-05,1.102e-04 
1.395e+10,1.143e+03,1.144e+03,1.162e+03,2.978e-05,3.062e-05,5.010e-05 
1.462e+10,1.114e+03,1.115e+03,1.133e+03,1.303e-05,1.342e-05,2.250e-05 
1.531e+10,1.085e+03,1.086e+03,1.104e+03,5.466e-06,5.637e-06,9.706e-06 
1.604e+10,1.056e+03,1.057e+03,1.075e+03,2.191e-06,2.263e-06,4.009e-06 
1.680e+10,1.028e+03,1.029e+03,1.047e+03,8.648e-07,8.947e-07,1.633e-06 
1.760e+10,1.001e+03,1.002e+03,1.019e+03,3.368e-07,3.491e-07,6.349e-07 
1.844e+10,9.732e+02,9.743e+02,9.910e+02,1.211e-07,1.262e-07,2.346e-07 
1.932e+10,9.464e+02,9.475e+02,9.639e+02,4.280e-08,4.472e-08,8.494e-08 
2.024e+10,9.200e+02,9.211e+02,9.373e+02,1.453e-08,1.522e-08,2.969e-08 
2.121e+10,8.941e+02,8.951e+02,9.110e+02,4.746e-09,4.962e-09,9.917e-09 
2.221e+10,8.686e+02,8.696e+02,8.853e+02,1.483e-09,1.554e-09,3.200e-09 
2.327e+10,8.436e+02,8.446e+02,8.600e+02,4.443e-10,4.668e-10,9.870e-10 
2.438e+10,8.192e+02,8.202e+02,8.352e+02,1.280e-10,1.349e-10,2.918e-10 
2.554e+10,7.952e+02,7.962e+02,8.109e+02,3.507e-11,3.707e-11,8.250e-11 
2.676e+10,7.718e+02,7.728e+02,7.872e+02,9.207e-12,9.765e-12,2.239e-11 
2.803e+10,7.490e+02,7.499e+02,7.640e+02,2.315e-12,2.448e-12,5.793e-12 
2.937e+10,7.268e+02,7.277e+02,7.414e+02,5.565e-13,5.906e-13,1.434e-12 
3.076e+10,7.051e+02,7.060e+02,7.193e+02,1.269e-13,1.352e-13,3.372e-13 
3.223e+10,6.841e+02,6.849e+02,6.979e+02,2.782e-14,2.952e-14,7.620e-14 
3.376e+10,6.637e+02,6.645e+02,6.771e+02,5.814e-15,6.193e-15,1.643e-14 
3.537e+10,6.439e+02,6.447e+02,6.569e+02,1.158e-15,1.239e-15,3.377e-15 
3.706e+10,6.247e+02,6.255e+02,6.373e+02,2.200e-16,2.362e-16,6.618e-16 
3.882e+10,6.061e+02,6.069e+02,6.183e+02,3.981e-17,4.294e-17,1.236e-16 
4.067e+10,5.882e+02,5.890e+02,6.000e+02,6.941e-18,7.522e-18,2.221e-17 
4.261e+10,5.710e+02,5.717e+02,5.823e+02,1.169e-18,1.259e-18,3.813e-18 
4.463e+10,5.543e+02,5.550e+02,5.652e+02,1.865e-19,2.019e-19,6.257e-19 
4.676e+10,5.382e+02,5.389e+02,5.488e+02,2.855e-20,3.105e-20,9.946e-20 
4.899e+10,5.228e+02,5.234e+02,5.329e+02,4.254e-21,4.591e-21,1.501e-20 
5.132e+10,5.079e+02,5.085e+02,5.177e+02,6.042e-22,6.551e-22,2.209e-21 
5.376e+10,4.936e+02,4.942e+02,5.030e+02,8.309e-23,9.052e-23,3.101e-22 
5.632e+10,4.799e+02,4.804e+02,4.889e+02,1.112e-23,1.199e-23,4.221e-23 
5.900e+10,4.666e+02,4.672e+02,4.753e+02,1.408e-24,1.550e-24,5.511e-24 
6.181e+10,4.539e+02,4.544e+02,4.623e+02,1.749e-25,1.903e-25,7.039e-25 
6.476e+10,4.417e+02,4.422e+02,4.498e+02,2.106e-26,2.302e-26,8.698e-26 
6.784e+10,4.300e+02,4.305e+02,4.377e+02,2.471e-27,2.714e-27,1.026e-26 
7.107e+10,4.187e+02,4.192e+02,4.261e+02,2.784e-28,3.074e-28,1.178e-27 
7.446e+10,4.079e+02,4.083e+02,4.150e+02,3.086e-29,3.354e-29,1.327e-28 
7.800e+10,3.975e+02,3.979e+02,4.043e+02,3.314e-30,3.618e-30,1.444e-29 
8.171e+10,3.875e+02,3.879e+02,3.940e+02,3.463e-31,3.799e-31,1.523e-30 
8.561e+10,3.778e+02,3.782e+02,3.842e+02,3.455e-32,3.808e-32,1.602e-31 
8.968e+10,3.685e+02,3.689e+02,3.746e+02,3.382e-33,3.747e-33,1.573e-32 
9.395e+10,3.596e+02,3.600e+02,3.655e+02,3.269e-34,3.640e-34,1.558e-33 
9.843e+10,3.510e+02,3.514e+02,3.567e+02,3.055e-35,3.420e-35,1.489e-34 
1.031e+11,3.428e+02,3.431e+02,3.482e+02,2.854e-36,3.119e-36,1.377e-35 
1.080e+11,3.348e+02,3.351e+02,3.400e+02,2.525e-37,2.772e-37,1.237e-36 
1.132e+11,3.271e+02,3.274e+02,3.321e+02,2.188e-38,2.412e-38,1.085e-37 
1.186e+11,3.197e+02,3.200e+02,3.245e+02,1.866e-39,2.066e-39,9.332e-39 
1.242e+11,3.125e+02,3.128e+02,3.172e+02,1.521e-40,1.692e-40,7.915e-40 
1.301e+11,3.056e+02,3.059e+02,3.101e+02,1.232e-41,1.377e-41,6.426e-41 
1.363e+11,2.989e+02,2.992e+02,3.033e+02,9.601e-43,1.079e-42,5.195e-42 
1.428e+11,2.924e+02,2.927e+02,2.967e+02,7.222e-44,8.159e-44,4.050e-43 
1.496e+11,2.862e+02,2.864e+02,2.903e+02,5.487e-45,5.973e-45,3.054e-44 
