# Supplementary material for: Dust sputtering within the inner heliosphere: a modelling study
Source: Copernicus journal article supplement (doi:10.5194/angeo-38-919-2020), 2020-08-03
Supplement: Supplementary file 1 [file angeo-38-919-2020-supplement.zip › carbon.txt]

carbon
H,0.0034,0.0076,0.0055 
He,0.0211,0.0567,0.0365 
C,0.1063,0.2389,0.1706 
O,0.1728,0.3614,0.2689 
N,0.1204,0.2606,0.1902 
Fe,1.3500,1.3500,1.3500 
Ne,0.3303,0.4620,0.4267 
Mg,0.6000,0.6000,0.6000 
Si,0.7200,0.7200,0.7200 
S,0.8300,0.8300,0.8300 
temperature/partial pressure
1.496e+09,3.276e+03,3.278e+03,3.314e+03,8.910e+02,9.070e+02,1.240e+03 
1.643e+09,3.157e+03,3.160e+03,3.195e+03,2.960e+02,3.050e+02,4.250e+02 
1.805e+09,3.043e+03,3.045e+03,3.080e+03,9.530e+01,9.730e+01,1.390e+02 
1.983e+09,2.933e+03,2.935e+03,2.969e+03,2.930e+01,3.000e+01,4.360e+01 
2.179e+09,2.827e+03,2.829e+03,2.863e+03,8.640e+00,8.850e+00,1.320e+01 
2.393e+09,2.724e+03,2.727e+03,2.760e+03,2.410e+00,2.500e+00,3.800e+00 
2.629e+09,2.626e+03,2.628e+03,2.661e+03,6.490e-01,6.680e-01,1.050e+00 
2.888e+09,2.531e+03,2.533e+03,2.565e+03,1.660e-01,1.710e-01,2.730e-01 
3.173e+09,2.439e+03,2.442e+03,2.473e+03,3.980e-02,4.180e-02,6.830e-02 
3.486e+09,2.351e+03,2.353e+03,2.384e+03,9.180e-03,9.500e-03,1.610e-02 
3.829e+09,2.267e+03,2.269e+03,2.299e+03,2.030e-03,2.110e-03,3.660e-03 
4.206e+09,2.185e+03,2.187e+03,2.216e+03,4.180e-04,4.350e-04,7.710e-04 
4.621e+09,2.106e+03,2.108e+03,2.137e+03,8.090e-05,8.450e-05,1.560e-04 
5.076e+09,2.030e+03,2.032e+03,2.060e+03,1.480e-05,1.550e-05,2.940e-05 
5.576e+09,1.957e+03,1.959e+03,1.986e+03,2.550e-06,2.680e-06,5.210e-06 
6.126e+09,1.887e+03,1.889e+03,1.915e+03,4.170e-07,4.400e-07,8.740e-07 
6.730e+09,1.819e+03,1.821e+03,1.846e+03,6.270e-08,6.640e-08,1.350e-07 
7.393e+09,1.754e+03,1.756e+03,1.780e+03,8.940e-09,9.510e-09,1.980e-08 
8.121e+09,1.691e+03,1.693e+03,1.717e+03,1.170e-09,1.250e-09,2.760e-09 
8.921e+09,1.630e+03,1.632e+03,1.655e+03,1.410e-10,1.520e-10,3.430e-10 
9.801e+09,1.572e+03,1.573e+03,1.596e+03,1.620e-11,1.690e-11,4.050e-11 
1.077e+10,1.516e+03,1.517e+03,1.539e+03,1.720e-12,1.790e-12,4.410e-12 
1.183e+10,1.461e+03,1.463e+03,1.484e+03,1.600e-13,1.750e-13,4.410e-13 
1.299e+10,1.409e+03,1.410e+03,1.431e+03,1.430e-14,1.500e-14,4.050e-14 
1.427e+10,1.359e+03,1.360e+03,1.380e+03,1.180e-15,1.240e-15,3.430e-15 
1.568e+10,1.310e+03,1.311e+03,1.330e+03,8.470e-17,8.950e-17,2.540e-16 
1.722e+10,1.263e+03,1.264e+03,1.283e+03,5.600e-18,5.950e-18,1.820e-17 
1.892e+10,1.218e+03,1.219e+03,1.237e+03,3.420e-19,3.640e-19,1.140e-18 
2.079e+10,1.174e+03,1.175e+03,1.193e+03,1.800e-20,1.930e-20,6.590e-20 
2.283e+10,1.132e+03,1.133e+03,1.150e+03,8.780e-22,9.460e-22,3.290e-21 
2.509e+10,1.092e+03,1.093e+03,1.109e+03,3.980e-23,4.310e-23,1.520e-22 
2.756e+10,1.053e+03,1.054e+03,1.069e+03,1.550e-24,1.690e-24,6.050e-24 
3.027e+10,1.015e+03,1.016e+03,1.031e+03,5.190e-26,5.700e-26,2.240e-25 
3.326e+10,9.780e+02,9.790e+02,9.940e+02,1.470e-27,1.630e-27,7.100e-27 
3.653e+10,9.430e+02,9.440e+02,9.590e+02,3.910e-29,4.350e-29,2.120e-28 
4.013e+10,9.100e+02,9.110e+02,9.240e+02,9.890e-31,1.110e-30,4.860e-30 
4.409e+10,8.770e+02,8.780e+02,8.910e+02,1.900e-32,2.150e-32,1.050e-31 
4.843e+10,8.450e+02,8.460e+02,8.590e+02,3.060e-34,3.490e-34,1.930e-33 
5.320e+10,8.150e+02,8.160e+02,8.280e+02,4.740e-36,5.480e-36,2.990e-35 
5.845e+10,7.860e+02,7.870e+02,7.990e+02,6.260e-38,7.300e-38,4.530e-37 
6.421e+10,7.580e+02,7.580e+02,7.700e+02,7.000e-40,7.000e-40,5.000e-39 
7.053e+10,7.300e+02,7.310e+02,7.420e+02,5.540e-42,6.630e-42,4.610e-41 
7.748e+10,7.040e+02,7.050e+02,7.160e+02,4.400e-44,5.330e-44,4.280e-43 
8.512e+10,6.790e+02,6.790e+02,6.900e+02,2.960e-46,2.960e-46,2.800e-45 
9.351e+10,6.540e+02,6.550e+02,6.650e+02,1.360e-48,1.700e-48,1.530e-47 
1.027e+11,6.310e+02,6.310e+02,6.410e+02,6.600e-51,6.600e-51,7.020e-50 
1.128e+11,6.080e+02,6.090e+02,6.180e+02,0.000e+00,0.000e+00,2.730e-52 
1.240e+11,5.860e+02,5.870e+02,5.960e+02,0.000e+00,0.000e+00,0.000e+00 
1.362e+11,5.650e+02,5.660e+02,5.740e+02,0.000e+00,0.000e+00,0.000e+00 
1.496e+11,5.450e+02,5.450e+02,5.540e+02,0.000e+00,0.000e+00,0.000e+00 
