# Supplementary material for: Dust sputtering within the inner heliosphere: a modelling study
Source: Copernicus journal article supplement (doi:10.5194/angeo-38-919-2020), 2020-08-03
Supplement: Supplementary file 1 [file angeo-38-919-2020-supplement.zip › FeOMgO.txt]

yield
H,0.0058,0.0168,0.0224,0.0083,0.0288,0.0379,0.0077,0.0261,0.0353 
He,0.0297,0.0865,0.1158,0.0621,0.1663,0.2293,0.0533,0.1498,0.1910 
C,0.1682,0.4592,0.6273,0.2878,0.7942,1.0600,0.2482,0.6800,0.9350 
O,0.2643,0.7043,0.9621,0.3812,1.0600,1.4400,0.3546,0.9845,1.3200 
N,0.2002,0.5531,0.7485,0.3505,0.9414,1.2700,0.2949,0.8078,1.1000 
Fe,0.8645,2.3300,3.1900,0.9622,2.6800,3.6600,0.9612,2.6600,3.6000 
Ne,0.3295,0.8883,1.2000,0.4828,1.3400,1.8000,0.4438,1.2100,1.6600 
Mg,0.3966,1.0700,1.4500,0.5667,1.5700,2.1200,0.5240,1.4400,1.9400 
Si,0.4718,1.2600,1.7000,0.6210,1.7300,2.3400,0.5878,1.6000,2.1600 
S,0.5632,1.5300,2.1000,0.6807,1.9100,2.5900,0.6482,1.7800,2.4300 
Temperature/partial pressure
1.496e+09,3.462e+03,3.464e+03,3.490e+03,1.106e+05,1.116e+05,1.254e+05 
1.567e+09,3.403e+03,3.405e+03,3.432e+03,8.454e+04,8.533e+04,9.659e+04 
1.642e+09,3.345e+03,3.347e+03,3.374e+03,6.435e+04,6.497e+04,7.384e+04 
1.720e+09,3.288e+03,3.290e+03,3.317e+03,4.880e+04,4.928e+04,5.624e+04 
1.802e+09,3.231e+03,3.234e+03,3.261e+03,3.668e+04,3.724e+04,4.268e+04 
1.888e+09,3.176e+03,3.178e+03,3.206e+03,2.760e+04,2.789e+04,3.227e+04 
1.978e+09,3.121e+03,3.124e+03,3.151e+03,2.058e+04,2.091e+04,2.418e+04 
2.072e+09,3.068e+03,3.070e+03,3.098e+03,1.537e+04,1.554e+04,1.815e+04 
2.170e+09,3.015e+03,3.017e+03,3.045e+03,1.137e+04,1.150e+04,1.350e+04 
2.274e+09,2.962e+03,2.965e+03,2.992e+03,8.322e+03,8.473e+03,9.940e+03 
2.382e+09,2.911e+03,2.913e+03,2.941e+03,6.106e+03,6.181e+03,7.335e+03 
2.495e+09,2.860e+03,2.863e+03,2.890e+03,4.433e+03,4.519e+03,5.358e+03 
2.614e+09,2.811e+03,2.813e+03,2.841e+03,3.226e+03,3.269e+03,3.924e+03 
2.739e+09,2.762e+03,2.764e+03,2.792e+03,2.323e+03,2.355e+03,2.844e+03 
2.869e+09,2.714e+03,2.716e+03,2.743e+03,1.666e+03,1.690e+03,2.040e+03 
3.006e+09,2.666e+03,2.669e+03,2.696e+03,1.182e+03,1.208e+03,1.467e+03 
3.149e+09,2.620e+03,2.622e+03,2.649e+03,8.405e+02,8.533e+02,1.043e+03 
3.299e+09,2.574e+03,2.576e+03,2.603e+03,5.910e+02,6.003e+02,7.390e+02 
3.456e+09,2.529e+03,2.531e+03,2.558e+03,4.139e+02,4.206e+02,5.214e+02 
3.620e+09,2.485e+03,2.487e+03,2.514e+03,2.887e+02,2.935e+02,3.666e+02 
3.793e+09,2.441e+03,2.444e+03,2.470e+03,1.989e+02,2.041e+02,2.546e+02 
3.973e+09,2.399e+03,2.401e+03,2.427e+03,1.377e+02,1.401e+02,1.762e+02 
4.163e+09,2.357e+03,2.359e+03,2.385e+03,9.410e+01,9.585e+01,1.214e+02 
4.361e+09,2.316e+03,2.318e+03,2.343e+03,6.408e+01,6.532e+01,8.265e+01 
4.569e+09,2.275e+03,2.277e+03,2.303e+03,4.306e+01,4.392e+01,5.658e+01 
4.786e+09,2.236e+03,2.238e+03,2.263e+03,2.913e+01,2.973e+01,3.824e+01 
5.014e+09,2.197e+03,2.199e+03,2.224e+03,1.944e+01,1.985e+01,2.575e+01 
5.253e+09,2.159e+03,2.161e+03,2.185e+03,1.293e+01,1.321e+01,1.711e+01 
5.503e+09,2.121e+03,2.123e+03,2.147e+03,8.480e+00,8.674e+00,1.134e+01 
5.765e+09,2.084e+03,2.086e+03,2.110e+03,5.544e+00,5.675e+00,7.485e+00 
6.039e+09,2.048e+03,2.050e+03,2.074e+03,3.615e+00,3.703e+00,4.930e+00 
6.327e+09,2.013e+03,2.015e+03,2.038e+03,2.352e+00,2.411e+00,3.202e+00 
6.628e+09,1.978e+03,1.980e+03,2.003e+03,1.507e+00,1.547e+00,2.074e+00 
6.944e+09,1.944e+03,1.946e+03,1.969e+03,9.640e-01,9.901e-01,1.341e+00 
7.274e+09,1.911e+03,1.913e+03,1.935e+03,6.156e-01,6.329e-01,8.543e-01 
7.621e+09,1.878e+03,1.880e+03,1.902e+03,3.872e-01,3.984e-01,5.433e-01 
7.984e+09,1.846e+03,1.848e+03,1.869e+03,2.432e-01,2.505e-01,3.402e-01 
8.364e+09,1.815e+03,1.816e+03,1.838e+03,1.526e-01,1.550e-01,2.159e-01 
8.762e+09,1.784e+03,1.786e+03,1.806e+03,9.430e-02,9.733e-02,1.329e-01 
9.179e+09,1.754e+03,1.755e+03,1.776e+03,5.826e-02,5.921e-02,8.307e-02 
9.616e+09,1.724e+03,1.726e+03,1.746e+03,3.541e-02,3.662e-02,5.110e-02 
1.007e+10,1.695e+03,1.696e+03,1.716e+03,2.152e-02,2.190e-02,3.092e-02 
1.055e+10,1.666e+03,1.668e+03,1.687e+03,1.287e-02,1.334e-02,1.871e-02 
1.106e+10,1.638e+03,1.640e+03,1.659e+03,7.700e-03,7.992e-03,1.134e-02 
1.158e+10,1.611e+03,1.612e+03,1.631e+03,4.616e-03,4.705e-03,6.754e-03 
1.213e+10,1.584e+03,1.585e+03,1.604e+03,2.721e-03,2.775e-03,4.031e-03 
1.271e+10,1.557e+03,1.559e+03,1.577e+03,1.575e-03,1.641e-03,2.365e-03 
1.332e+10,1.531e+03,1.533e+03,1.551e+03,9.142e-04,9.539e-04,1.391e-03 
1.395e+10,1.506e+03,1.507e+03,1.525e+03,5.326e-04,5.444e-04,8.043e-04 
1.462e+10,1.481e+03,1.482e+03,1.500e+03,3.048e-04,3.118e-04,4.666e-04 
1.531e+10,1.457e+03,1.458e+03,1.475e+03,1.753e-04,1.794e-04,2.659e-04 
1.604e+10,1.433e+03,1.434e+03,1.451e+03,9.898e-05,1.014e-04,1.522e-04 
1.680e+10,1.409e+03,1.410e+03,1.427e+03,5.484e-05,5.623e-05,8.555e-05 
1.760e+10,1.386e+03,1.387e+03,1.403e+03,3.057e-05,3.137e-05,4.717e-05 
1.844e+10,1.363e+03,1.364e+03,1.380e+03,1.671e-05,1.716e-05,2.616e-05 
1.932e+10,1.341e+03,1.342e+03,1.358e+03,9.204e-06,9.461e-06,1.462e-05 
2.024e+10,1.319e+03,1.320e+03,1.335e+03,4.971e-06,5.115e-06,7.796e-06 
2.121e+10,1.297e+03,1.298e+03,1.314e+03,2.631e-06,2.709e-06,4.310e-06 
2.221e+10,1.276e+03,1.277e+03,1.292e+03,1.405e-06,1.448e-06,2.270e-06 
2.327e+10,1.255e+03,1.256e+03,1.271e+03,7.348e-07,7.582e-07,1.206e-06 
2.438e+10,1.235e+03,1.236e+03,1.250e+03,3.885e-07,4.013e-07,6.278e-07 
2.554e+10,1.214e+03,1.216e+03,1.230e+03,1.946e-07,2.081e-07,3.302e-07 
2.676e+10,1.195e+03,1.196e+03,1.210e+03,1.020e-07,1.056e-07,1.702e-07 
2.803e+10,1.175e+03,1.176e+03,1.190e+03,5.055e-08,5.239e-08,8.578e-08 
2.937e+10,1.156e+03,1.157e+03,1.171e+03,2.538e-08,2.633e-08,4.381e-08 
3.076e+10,1.137e+03,1.138e+03,1.152e+03,1.246e-08,1.294e-08,2.189e-08 
3.223e+10,1.119e+03,1.120e+03,1.133e+03,6.210e-09,6.458e-09,1.069e-08 
3.376e+10,1.100e+03,1.101e+03,1.115e+03,2.906e-09,3.027e-09,5.304e-09 
3.537e+10,1.082e+03,1.083e+03,1.096e+03,1.382e-09,1.441e-09,2.469e-09 
3.706e+10,1.065e+03,1.066e+03,1.079e+03,6.695e-10,6.990e-10,1.218e-09 
3.882e+10,1.047e+03,1.048e+03,1.061e+03,3.030e-10,3.169e-10,5.626e-10 
4.067e+10,1.030e+03,1.031e+03,1.044e+03,1.398e-10,1.464e-10,2.648e-10 
4.261e+10,1.013e+03,1.014e+03,1.026e+03,6.283e-11,6.590e-11,1.161e-10 
4.463e+10,9.962e+02,9.972e+02,1.009e+03,2.777e-11,2.917e-11,5.185e-11 
4.676e+10,9.797e+02,9.807e+02,9.928e+02,1.212e-11,1.276e-11,2.346e-11 
4.899e+10,9.634e+02,9.643e+02,9.763e+02,5.199e-12,5.452e-12,1.018e-11 
5.132e+10,9.473e+02,9.482e+02,9.600e+02,2.191e-12,2.301e-12,4.342e-12 
5.376e+10,9.313e+02,9.323e+02,9.440e+02,9.010e-13,9.533e-13,1.828e-12 
5.632e+10,9.156e+02,9.165e+02,9.281e+02,3.657e-13,3.855e-13,7.516e-13 
5.900e+10,9.001e+02,9.010e+02,9.125e+02,1.456e-13,1.538e-13,3.050e-13 
6.181e+10,8.847e+02,8.856e+02,8.970e+02,5.653e-14,5.979e-14,1.207e-13 
6.476e+10,8.695e+02,8.704e+02,8.816e+02,2.150e-14,2.278e-14,4.654e-14 
6.784e+10,8.544e+02,8.553e+02,8.665e+02,7.952e-15,8.446e-15,1.769e-14 
7.107e+10,8.395e+02,8.404e+02,8.515e+02,2.879e-15,3.064e-15,6.543e-15 
7.446e+10,8.248e+02,8.256e+02,8.366e+02,1.019e-15,1.080e-15,2.352e-15 
7.800e+10,8.101e+02,8.110e+02,8.219e+02,3.476e-16,3.717e-16,8.269e-16 
8.171e+10,7.956e+02,7.965e+02,8.073e+02,1.157e-16,1.240e-16,2.819e-16 
8.561e+10,7.812e+02,7.821e+02,7.928e+02,3.727e-17,4.005e-17,9.312e-17 
8.968e+10,7.670e+02,7.678e+02,7.785e+02,1.170e-17,1.250e-17,3.000e-17 
9.395e+10,7.528e+02,7.536e+02,7.642e+02,3.516e-18,3.767e-18,9.263e-18 
9.843e+10,7.387e+02,7.395e+02,7.501e+02,1.018e-18,1.093e-18,2.783e-18 
1.031e+11,7.247e+02,7.255e+02,7.360e+02,2.834e-19,3.053e-19,7.984e-19 
1.080e+11,7.108e+02,7.116e+02,7.221e+02,7.576e-20,8.185e-20,2.223e-19 
1.132e+11,6.970e+02,6.978e+02,7.082e+02,1.940e-20,2.103e-20,5.885e-20 
1.186e+11,6.832e+02,6.840e+02,6.944e+02,4.703e-21,5.114e-21,1.492e-20 
1.242e+11,6.695e+02,6.703e+02,6.807e+02,1.087e-21,1.186e-21,3.616e-21 
1.301e+11,6.559e+02,6.567e+02,6.670e+02,2.388e-22,2.615e-22,8.264e-22 
1.363e+11,6.423e+02,6.431e+02,6.534e+02,4.920e-23,5.409e-23,1.795e-22 
1.428e+11,6.287e+02,6.296e+02,6.398e+02,9.462e-24,1.058e-23,3.653e-23 
1.496e+11,6.153e+02,6.161e+02,6.263e+02,1.735e-24,1.924e-24,7.021e-24 
